# Supplementary material for: Oral arsenic plus imatinib versus imatinib solely for newly diagnosed chronic myeloid leukemia: a randomized phase 3 trial with 5-year outcomes
Source: Springer Nature journal article supplement (doi:10.1007/s00432-024-05700-x), 2024-04-11
Supplement: MOESM1 [file 26967148]

## Supplementary Material

Table S1. Study Inclusion and Exclusion Criteria

|                    |                                                                                                                                                                                                                                                                                                                                                                                                                                                                                                                                                                                                                                                                                                                                                                                                                                                                                                                                                                                                                                                                                                                                                                                                                                                                                                                                                                                                                                                                                                                                                                                                                                                                                                                                                                                                                                                                                                                                                                                                                                       |
|--------------------|---------------------------------------------------------------------------------------------------------------------------------------------------------------------------------------------------------------------------------------------------------------------------------------------------------------------------------------------------------------------------------------------------------------------------------------------------------------------------------------------------------------------------------------------------------------------------------------------------------------------------------------------------------------------------------------------------------------------------------------------------------------------------------------------------------------------------------------------------------------------------------------------------------------------------------------------------------------------------------------------------------------------------------------------------------------------------------------------------------------------------------------------------------------------------------------------------------------------------------------------------------------------------------------------------------------------------------------------------------------------------------------------------------------------------------------------------------------------------------------------------------------------------------------------------------------------------------------------------------------------------------------------------------------------------------------------------------------------------------------------------------------------------------------------------------------------------------------------------------------------------------------------------------------------------------------------------------------------------------------------------------------------------------------|
| Inclusion criteria | <ul style="list-style-type: none"> <li>● Age <math>\geq 18</math> years and <math>\leq 75</math> years</li> <li>● Cytogenetic diagnosis of Ph-positive CP CML within 12 months, satisfied all of the following:             <ul style="list-style-type: none"> <li>• Bone marrow cytogenetics Ph chromosome t (9;22) positive (check at least 20 mitotic figures) and/or molecular biology test <i>BCR::ABL</i> fusion gene positive</li> <li>• Blasts <math>&lt; 15\%</math>, basophils <math>&lt; 20\%</math>, and blasts promyelocytes <math>&lt; 30\%</math> in peripheral blood and bone marrow</li> <li>• Platelets <math>&gt; 100 \times 10^9/L</math>, or <math>\leq 100 \times 10^9/L</math> related to prior medical treatment</li> <li>• No extramedullary disease (except liver or spleen)</li> </ul> </li> <li>● ECOG performance status of 0 or 2</li> <li>● Adequate hepatic function (ALT/AST <math>\leq 2.5 \times ULN</math>, total bilirubin <math>\leq 1.5 \times ULN</math>)</li> <li>● Adequate renal function (creatinine <math>\leq 1.5 \times ULN</math>)</li> <li>● Serum amylase and lipase <math>\leq 1.5 \times ULN</math></li> <li>● Signed and dated informed consent form prior to protocol-specific screening procedures</li> </ul>                                                                                                                                                                                                                                                                                                                                                                                                                                                                                                                                                                                                                                                                                                                                                                  |
| Exclusion criteria | <ul style="list-style-type: none"> <li>● Prior or undergoing antileukemia treatment, included any one of the following:             <ul style="list-style-type: none"> <li>• <math>\leq 2</math> days of hydroxyurea or <math>\leq 7</math> days of anagrelide</li> <li>• <math>\leq 14</math> days of Homoharringtonine</li> <li>• <math>\leq 28</math> days of Cytarabine, interferon-alpha, anthracyclines, mitoxantrone, or etoposide</li> <li>• prior any form of tyrosine kinase inhibitor or arsenic treatment</li> <li>• prior stem-cell transplantation</li> </ul> </li> <li>● Ph-negative CML or history of AP or BP CML</li> <li>● CML with chronic myelofibrosis</li> <li>● Major surgery within 4 weeks of random assignment</li> <li>● CNS leukemia</li> <li>● Impaired cardiac function including any one of the following:             <ul style="list-style-type: none"> <li>• Echocardiogram with left ventricular ejection fraction (LVEF) <math>&lt; 50\%</math></li> <li>• Screening ECG with a QTc <math>&gt; 450</math> msec in men or QTc <math>&gt; 470</math> msec in women</li> <li>• Patients with congenital long QT syndrome</li> <li>• clinically significant ventricular arrhythmia</li> <li>• Clinically significant bradycardia (heart rate <math>&lt; 50</math> beats/min)</li> <li>• Congestive heart failure (NY Heart Association class III or IV)</li> <li>• Complete left bundle branch block</li> <li>• History of myocardial infarction or unstable angina pectoris within 12 months</li> <li>• unexplained syncope</li> </ul> </li> <li>● Unstable or severe uncontrolled medical condition, evidence of serious active infection, uncontrolled hypertension, significant psychiatric illness, or any important medical illness or abnormal laboratory finding that would, in the investigator's judgment, increase the risk associated with the patient's participation in the study</li> <li>● History of acute pancreatitis within 1 year or history of chronic pancreatitis</li> </ul> |

|  |                                                                                                                                                                                                                                                                                                                                                                                                                                           |
|--|-------------------------------------------------------------------------------------------------------------------------------------------------------------------------------------------------------------------------------------------------------------------------------------------------------------------------------------------------------------------------------------------------------------------------------------------|
|  | <ul style="list-style-type: none"> <li>● Recent or ongoing clinically significant GI disorder</li> <li>● Pregnant or breastfeeding</li> <li>● Participated in other new drug clinical trials as subjects within 4 weeks</li> <li>● Allergic to any test drugs and its excipients</li> <li>● Patients with any significant history of non-compliance to medical regimens or with inability to grant a reliable informed consent</li> </ul> |
|--|-------------------------------------------------------------------------------------------------------------------------------------------------------------------------------------------------------------------------------------------------------------------------------------------------------------------------------------------------------------------------------------------------------------------------------------------|

Abbreviations: AP, accelerated phase; BP, blast phase; CML, chronic myeloid leukemia; CP, chronic phase; ECOG, Eastern Cooperative Oncology Group; Ph, Philadelphia chromosome; QTc, corrected QT interval; ULN, upper limit of normal.

### *Procedures*

#### **Treatment, dose modification and measure**

Following randomization, patients assigned to combination group received RIF (target dose, 65 mg per square meter of body-surface area per day in three oral divided doses), and patients in imatinib group received placebo (RIF simulant) for 14 consecutive days every month. All patients also received 400 mg imatinib orally daily. Gradually escalating doses of RIF or placebo were given in the first month of treatment, until up to the target dose as long as grade 3 or 4 toxicity did not occur. From the second course on, RIF or placebo was administered on the target dose directly. Total course of treatment is 12 months (a month defined as 28 days). After 12 months, all patients only received imatinib daily.

Therapy continued until treatment failure, unacceptable toxicity, or other criteria for withdrawal were met. Doses could be reduced to manage drug-related adverse events (AE) and re-escalated once events resolved. Dose reductions to less than 2250 mg for RIF or placebo, or less than 300 mg for imatinib were not permitted. An escalation of imatinib dose was not permitted.

Molecular response was assessed for *BCR::ABL1* performed by quantitative real-time polymerase-chain-reaction (qRT-PCR) from peripheral blood, using *ABL1* as control gene, expressed on the international scale (IS) (Müller, Cross et al. 2009) with conversion factor of 0.66, assayed at a centralized laboratory (Guangzhou KingMed Diagnostics Group Co.) at baseline, every 3 months for the first year, and every 3 or 6 months thereafter. Bone marrow cytogenetic analyses were conducted at screening and at months 3, 6 and 12. Blood and urinary arsenic concentration were measured at screening and at months 6 and 12, then every year up to 3 years from randomization. Other laboratory assessments (including complete blood counts, serum chemistry, blood sugar, serum potassium, calcium, and magnesium) were measured at screening, baseline, at weeks 2 for the first 3 months and the last day of every month thereafter.

Table S2. Patient Status at 5 Years.

| Status                                | RIF/IM(n=96) | Placebo/IM(n=95) |
|---------------------------------------|--------------|------------------|
| Remained on study                     | 80(83.3)     | 79(83.2)         |
| Remained on core treatment            | 45(46.9)     | 44(46.3)         |
| Exchange to other anti-CML drugs*     | 35(36.5)     | 35(36.8)         |
| Suboptimal response/treatment failure | 27 (28.1)    | 25(26.3)         |
| Disease progression to AP/BP*         | 6(6.2)       | 4(4.2)           |
| Adverse event                         | 7 (7.3)      | 9(9.5)           |
| Other                                 | 1(1.0)       | 1(1.1)           |
| Death                                 | 7(7.3)       | 5(5.3)           |
| CML related                           | 4(4.2)       | 2(2.1)           |
| Car accident                          | 1(1.0)       | 0                |
| Other tumor                           | 0            | 1(1.1)           |
| Cerebral hemorrhage                   | 0            | 1(1.1)           |
| Unknown                               | 2(2.1)       | 1(1.1)           |
| Lost to follow-up                     | 6(6.3)       | 9(9.5)           |
| Other                                 | 3(3.1)       | 1(1.1)           |

NOTE. Data are No.(%). \* Other anti-CML drugs were the second-generation TKIs in this study. Abbreviations: RIF,realgar-Indigo naturalis formula; IM,Imatinib; CML, chronic myeloid leukemia; AP, accelerated phase; BP, blast phase.

Table S3. Five-year outcomes according to Sokal risk score.

|                                              | RIF/IM   | Placebo/IM |
|----------------------------------------------|----------|------------|
| Low Sokal risk,n                             | 45       | 44         |
| MR <sup>4.5</sup> by 5 years,n(%)            | 32(71.1) | 28(63.6)   |
| MR <sup>4.5</sup> by 2 years,n(%)            | 23(51.1) | 16(36.4)   |
| Estimated 5-year PFS on study,% <sup>a</sup> | 100      | 97.7       |
| Estimated 5-year OS on study,% <sup>a</sup>  | 100      | 97.7       |
| Intermediate Sokal risk,n                    | 38       | 38         |
| MR <sup>4.5</sup> by 5 years,n(%)            | 23(60.5) | 21(55.3)   |
| MR <sup>4.5</sup> by 2 years,n(%)            | 11(28.9) | 13(34.2)   |
| Estimated 5-year PFS on study,% <sup>a</sup> | 86.8     | 94.7       |
| Estimated 5-year OS on study,% <sup>a</sup>  | 86.5     | 92.1       |
| High Sokal risk,n                            | 13       | 13         |
| MR <sup>4.5</sup> by 5 years,n(%)            | 4(30.8)  | 7(53.8)    |
| MR <sup>4.5</sup> by 2 years,n(%)            | 3(23.1)  | 5(38.5)    |
| Estimated 5-year PFS on study,% <sup>a</sup> | 92.3     | 92.3       |
| Estimated 5-year OS on study,% <sup>a</sup>  | 81.8     | 90.9       |

Abbreviations: AP/BC, accelerated phase/blast crisis; MR<sup>4.5</sup>, molecular response 4.5 ( $BCR::ABL \leq 0.0032\%$  on the International Scale); OS,overall survival; PFS,progression-free survival.a,Estimated by Kaplan–Meier analysis.

Table S4. Safety findings

| Event                                                 | RIF/IM(n=96)      |                   | Placebo/IM(n=95)  |                   |
|-------------------------------------------------------|-------------------|-------------------|-------------------|-------------------|
|                                                       | Any<br>grade(n,%) | Grade<br>3/4(n,%) | Any<br>grade(n,%) | Grade<br>3/4(n,%) |
| All events                                            | 93(96.9)          | 34(35.4)          | 87(91.6)          | 38(40.0)          |
| Nonhematologic adverse<br>event                       | 88(91.7)          | 6(6.3)            | 83(87.4)          | 6(6.3)            |
| Rash                                                  | 6(6.3)            | 0(0.0)            | 13(13.7)          | 2(2.1)            |
| Pruritus                                              | 9(9.4)            | 0(0.0)            | 12(12.6)          | 0(0.0)            |
| Constipation                                          | 2(2.1)            | 0(0.0)            | 1(1.1)            | 0(0.0)            |
| Diarrhea                                              | 26(27.1)          | 0(0.0)            | 14(14.7)          | 0(0.0)            |
| Vomiting                                              | 25(26.0)          | 1(1.0)            | 17(17.9)          | 0(0.0)            |
| Nausea                                                | 33(34.4)          | 1(1.0)            | 17(17.9)          | 1(1.1)            |
| Muscle ache                                           | 25(26.0)          | 0(0.0)            | 32(33.7)          | 0(0.0)            |
| Muscle cramps                                         | 2(2.1)            | 0(0.0)            | 12(12.6)          | 0(0.0)            |
| Abdominal pain                                        | 19(19.8)          | 0(0.0)            | 12(12.6)          | 0(0.0)            |
| Abdominal distension                                  | 14(14.6)          | 0(0.0)            | 9(9.5)            | 0(0.0)            |
| Fatigue                                               | 14(14.6)          | 0(0.0)            | 10(10.5)          | 0(0.0)            |
| Bone pain                                             | 5(5.2)            | 0(0.0)            | 4(4.2)            | 0(0.0)            |
| Joint pain                                            | 9(9.4)            | 0(0.0)            | 8(8.4)            | 0(0.0)            |
| Headache                                              | 9(9.4)            | 0(0.0)            | 7(7.4)            | 0(0.0)            |
| Edema*                                                | 65(67.7)          | 2(2.1)            | 57(60.0)          | 0(0.0)            |
| Facial edema                                          | 58(60.4)          | 2(2.1)            | 50(52.6)          | 0(0.0)            |
| Pyrexia                                               | 12(12.5)          | 0(0.0)            | 13(13.7)          | 1(1.1)            |
| Pulmonary infection<br>Upper respiratory<br>infection | 1(1.0)            | 0(0.0)            | 1(1.1)            | 0(0.0)            |
| Urinary infection                                     | 38(39.6)          | 1(1.0)            | 28(29.5)          | 0(0.0)            |
| Bleeding                                              | 6(6.3)            | 1(1.0)            | 8(8.4)            | 0(0.0)            |
|                                                       | 5(5.2)            | 0(0.0)            | 11(11.6)          | 1(1.1)            |
| Cytopenia                                             | 71(74.0)          | 30(31.3)          | 62(65.3)          | 26(27.4)          |
| Anemia                                                | 43(44.8)          | 5(5.2)            | 36(37.9)          | 7(7.4)            |
| Thrombocytopenia                                      | 34(35.4)          | 15(15.6)          | 38(40.0)          | 13(13.7)          |
| Leucopenia                                            | 64(66.7)          | 23(24.0)          | 52(54.7)          | 17(17.9)          |
| Laboratory abnormality                                | 59(61.5)          | 4(4.2)            | 52(54.7)          | 5(5.3)            |
| Elevated ALT                                          | 32(33.3)          | 0(0.0)            | 12(12.6)          | 1(1.1)            |
| Elevated AST                                          | 30(31.3)          | 0(0.0)            | 10(10.5)          | 1(1.1)            |
| Elevated alkaline<br>phosphatase                      | 15(15.6)          | 0(0.0)            | 16(16.8)          | 0(0.0)            |
| Elevated GGT                                          | 8(8.3)            | 0(0.0)            | 10(10.5)          | 1(1.1)            |
| Elevated bilirubin                                    | 1(1.0)            | 0(0.0)            | 1(1.1)            | 1(1.1)            |
| Hypofibrinogenaemia                                   | 6(6.3)            | 1(1.0)            | 5(5.3)            | 0(0.0)            |

|                           |          |        |          |        |
|---------------------------|----------|--------|----------|--------|
| Elevated amylase          | 8(8.3)   | 0(0.0) | 8(8.4)   | 0(0.0) |
| Elevated lipase           | 2(2.1)   | 0(0.0) | 0(0.0)   | 0(0.0) |
| Hyperlipemia              | 5(5.2)   | 0(0.0) | 5(5.3)   | 0(0.0) |
| Hyperglycemia             | 7(7.3)   | 0(0.0) | 13(13.7) | 0(0.0) |
| Hyperuricemia             | 6(6.3)   | 0(0.0) | 1(1.1)   | 0(0.0) |
| Elevated serum creatinine | 3(3.1)   | 0(0.0) | 1(1.1)   | 0(0.0) |
| Elevated LDH              | 7(7.3)   | 0(0.0) | 11(11.6) | 0(0.0) |
| Elevated creatine kinase  | 2(2.1)   | 0(0.0) | 3(3.2)   | 0(0.0) |
| Hypocalcemia              | 6(6.3)   | 0(0.0) | 5(5.3)   | 0(0.0) |
| Hypokalemia               | 3(3.1)   | 0(0.0) | 9(9.5)   | 1(1.1) |
| Hypophosphatemia          | 25(26.0) | 3(3.1) | 19(20.0) | 2(2.1) |
| Hypomagnesemia            | 2(2.1)   | 0(0.0) | 1(1.1)   | 0(0.0) |

---

Data are number of patients(%). Adverse events were graded according to the Common Toxicity Criteria of the National Cancer Institute.\* Edema includes edema, eye edema, orbital and periorbital edema, face edema, localized edema, edema peripheral, allergic edema, weight increased, pharyngeal edema, and pulmonary edema. Abbreviations: RIF,realgar-Indigo naturalis formula; IM,Imatinib; ALT,alanine aminotransferase; AST,aspartate aminotransferase; ALP,alkaline phosphatase; GGT, $\gamma$ -glutamyl transpeptidase.

---

Table S5. Drug-related cardiac adverse events.

| Event                         | RIF/IM(n=96)      |                   | Placebo/IM(n=95)  |                   |
|-------------------------------|-------------------|-------------------|-------------------|-------------------|
|                               | Any<br>grade(n,%) | Grade<br>3/4(n,%) | Any<br>grade(n,%) | Grade<br>3/4(n,%) |
| All events                    | 12(12.5)          | 0(0.0)            | 10(10.5)          | 1(1.1)            |
| Atrioventricular block        | 1(1.0)            | 0(0.0)            | 1(1.1)            | 0(0.0)            |
| Prolonged QT interval*        | 0(0.0)            | 0(0.0)            | 4(4.2)            | 1(1.1)            |
| Shortened QT interval         | 0(0.0)            | 0(0.0)            | 1(1.1)            | 0(0.0)            |
| T-wave changes                | 2(2.1)            | 0(0.0)            | 3(3.2)            | 0(0.0)            |
| Sinus bradycardia             | 4(4.2)            | 0(0.0)            | 0(0.0)            | 0(0.0)            |
| Sinus tachycardia             | 2(2.1)            | 0(0.0)            | 2(2.1)            | 0(0.0)            |
| Sinus arrhythmia              | 1(1.0)            | 0(0.0)            | 1(1.1)            | 0(0.0)            |
| Auricular premature beat      | 3(3.1)            | 0(0.0)            | 2(2.1)            | 0(0.0)            |
| Ventricular premature<br>beat | 1(1.0)            | 0(0.0)            | 0(0.0)            | 0(0.0)            |

Data are number of patients(%). Adverse events were graded according to the Common Toxicity Criteria of the National Cancer Institute. \* The results of prolonged QTc interval corrected for heart rate were 461,469,508 and 510msec.

---

Table S6. Dose interruptions and reductions for adverse events.

---

| Event(n,%)                   | RIF/IM(n=96) | Placebo/IM(n=95) |
|------------------------------|--------------|------------------|
| All events                   | 45(46.9)     | 34(35.8)         |
| Gastrointestinal abnormality | 8(8.3)       | 2(2.1)           |
| Hepatic toxic effects        | 10(10.4)     | 3(3.2)           |
| Hematologic abnormality      | 23(24.0)     | 21(22.1)         |
| Cardiac abnormality          | 1(1.0)       | 4(4.2)           |
| Rash                         | 4(4.2)       | 5(5.3)           |
| Infection                    | 4(4.2)       | 3(3.2)           |
| Others                       | 13(13.5)     | 8(8.4)           |

---

Data are number of patients(%). Adverse events were graded according to the Common Toxicity Criteria of the National Cancer Institute. Abbreviations: RIF,realgar-Indigo naturalis formula; IM,Imatinib.

---

Reference

Müller, M. C., et al. (2009). "Harmonization of molecular monitoring of CML therapy in Europe." Leukemia **23**(11): 1957-1963.
